# Supplementary material for: Community-Level Factors Associated with COVID-19 Cases and Testing Equity in King County, Washington
Source: MDPI journal article supplement (doi:10.3390/ijerph17249516), 2020-12-18

Predicted Positivity Rate

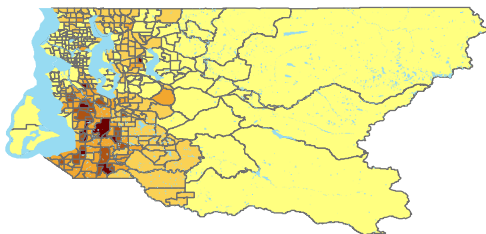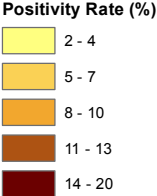

Deviance Residuals

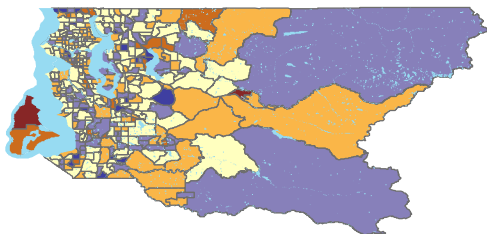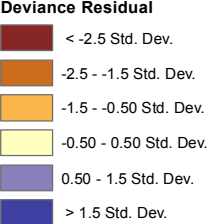

Low Educational Attainment

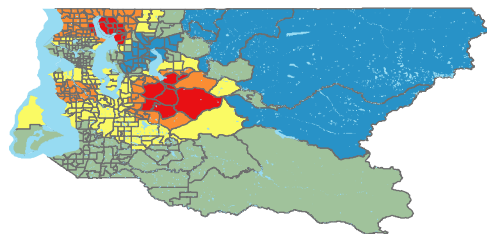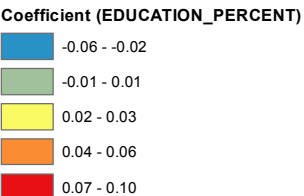

Poverty

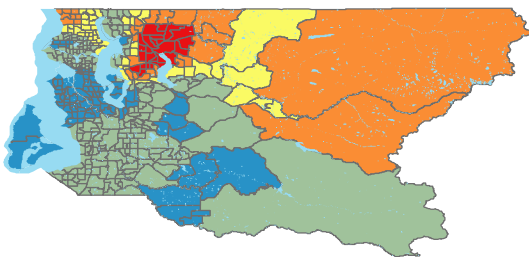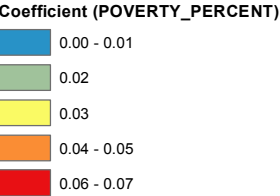

People of Color

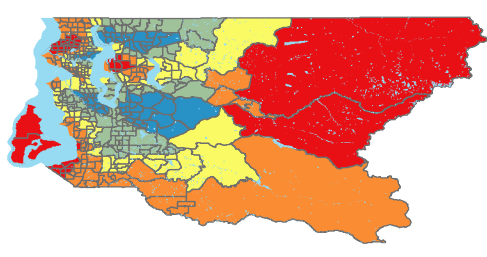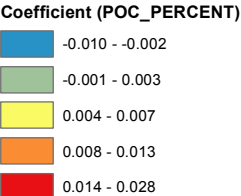

Transportation Cost

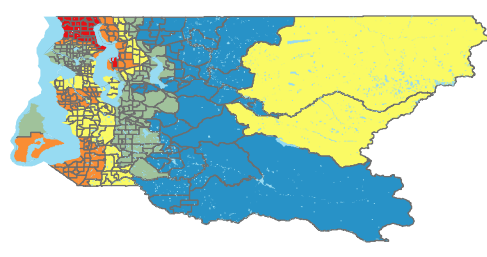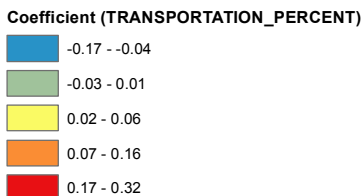

Supplement: s1 [file s1]
