# Supplementary material for: Community-Level Factors Associated with COVID-19 Cases and Testing Equity in King County, Washington
Source: MDPI journal article supplement (doi:10.3390/ijerph17249516), 2020-12-18

Predicted Testing Rate

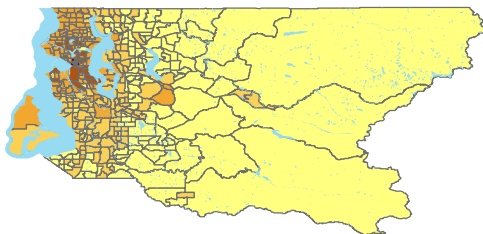

Tests per 1,000

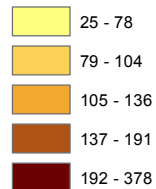

Deviance Residuals

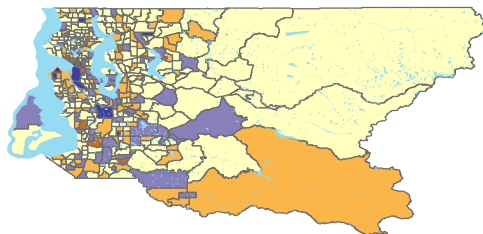

Deviance Residual

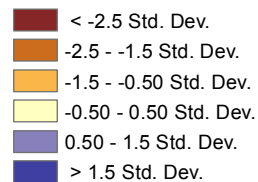

Low Educational Attainment

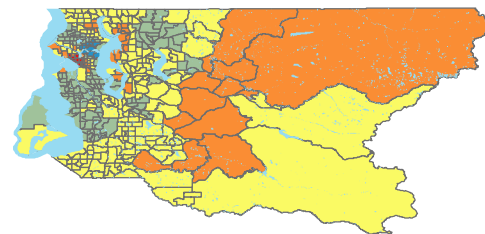

Coefficient (EDUCATION\_PERCENT)

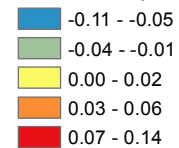

Unemployment

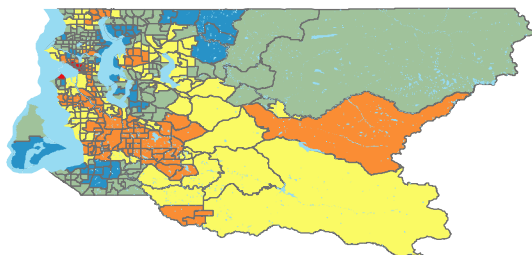

Coefficient (UNEMPLOYED\_PERCENT)

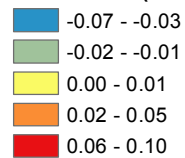

People of Color

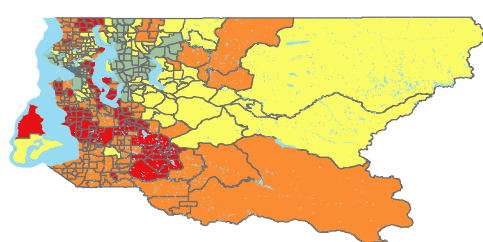

Coefficient (POC\_PERCENT)

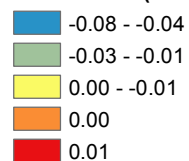

Transportation Cost

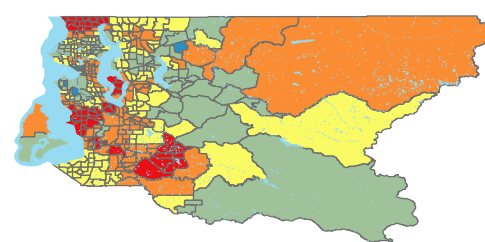

Coefficient (TRANSPORTATION\_PERCENT)

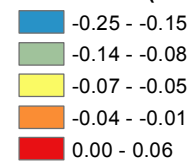

Supplement: s1 [file s1]
